# Supplementary material
Source: ML conference proceedings conference paper supplement (https://proceedings.neurips.cc/paper_files/paper/2018/hash/0cd60efb5578cd967c3c23894f305800-Abstract.html)
Supplement: Supplementary file [file 0cd60efb5578cd967c3c23894f305800-Supplemental.zip]

## A Detailed derivation of the weighted ELBO

We simplify the notation and write the distribution of the inference model over a subsequence  $\mathbf{h}_{i...j}$  as  $q(\mathbf{h}_{i...j}) = \prod_{t=i}^j q(\mathbf{h}_t | \mathbf{h}_{t-1}, w_{t...T})$  for any  $1 \leq i \leq j \leq T$  without making the dependency on  $\mathbf{h}_{i-1}$  and the data explicit. Furthermore, let  $\mathcal{K}_t = \{\mathbf{h}_t^{(k)}\}_{k=1}^K \sim q(\mathbf{h}_t)$  be short for a set of  $K$  samples of  $\mathbf{h}_t$  from the inference model. Finally, let  $\theta$  summarize all parameters of both, generative and inference model.

The key idea is to write the marginal as a nested expectation

$$P(\mathbf{w}) = \mathbb{E}_{q(\mathbf{h}_1)} \left[ P(w_1, \mathbf{h}_1) \mathbb{E}_{q(\mathbf{h}_{2...T})} [P(w_{2...T}, \mathbf{h}_{2...T} | \mathbf{h}_1)] \right] \quad (14)$$

and observe that we can perform an MC estimate with respect to  $\mathbf{h}_1$  only

$$P(\mathbf{w}) \approx \mathbb{E}_{\mathcal{K}_1} \left[ P(w_1, \mathbf{h}_1) \mathbb{E}_{q(\mathbf{h}_{2...T})} [P(w_{2...T}, \mathbf{h}_{2...T} | \mathbf{h}_1^{(k)})] \right] \quad (15)$$

The same argument applies for  $\frac{P(\mathbf{w}, \mathbf{h})}{q(\mathbf{h})}$ , the integrand in the ELBO. Now we can repeat the IWAE argument from [BGS15] for the outer expectation

$$\log P(\mathbf{w}) = \log \mathbb{E}_{q(\mathbf{h})} \left[ \frac{P(\mathbf{w}, \mathbf{h})}{q(\mathbf{h})} \right] \quad (16)$$

$$= \log \mathbb{E}_{q(\mathbf{h}_1)} \left[ \frac{P(w_1, \mathbf{h}_1)}{q(\mathbf{h}_1)} \mathbb{E}_{q(\mathbf{h}_{2...T})} \left[ \frac{P(w_{2...T}, \mathbf{h}_{2...T} | \mathbf{h}_1)}{q(\mathbf{h}_{2...T})} \right] \right] \quad (17)$$

$$= \log \mathbb{E}_{\mathcal{K}_1} \left[ \frac{1}{K} \sum_{k=1}^K \frac{P(w_1, \mathbf{h}_1^{(k)})}{q(\mathbf{h}_1^{(k)})} \mathbb{E}_{q(\mathbf{h}_{2...T})} \left[ \frac{P(w_{2...T}, \mathbf{h}_{2...T} | \mathbf{h}_1^{(k)})}{q(\mathbf{h}_{2...T})} \right] \right] \quad (18)$$

$$\geq \mathbb{E}_{\mathcal{K}_1} \left[ \log \frac{1}{K} \sum_{k=1}^K \frac{P(w_1, \mathbf{h}_1^{(k)})}{q(\mathbf{h}_1^{(k)})} \mathbb{E}_{q(\mathbf{h}_{2...T})} \left[ \frac{P(w_{2...T}, \mathbf{h}_{2...T} | \mathbf{h}_1^{(k)})}{q(\mathbf{h}_{2...T})} \right] \right] = \mathcal{L} \quad (19)$$

$$(20)$$

where we have used the above factorization in (17), MC sampling in (18) and Jensen's inequality in (19). Now we can identify

$$\omega_1^{(k)} = \frac{P(w_1, \mathbf{h}_1^{(k)})}{q(\mathbf{h}_1^{(k)})} \mathbb{E}_{q(\mathbf{h}_{2...T})} \left[ \frac{P(w_{2...T}, \mathbf{h}_{2...T} | \mathbf{h}_1^{(k)})}{q(\mathbf{h}_{2...T})} \right] \quad (21)$$

and use the log-derivative trick to derive gradients

$$\nabla \mathcal{L} = \mathbb{E}_{\mathcal{K}_1} \left[ \sum_{k=1}^K \frac{\omega_1^{(k)}}{\sum_{k'} \omega_1^{(k')}} \nabla \log \omega_1^{(k)} \right] \quad (22)$$

Again, we have omitted carrying out the re-parametrization trick explicitly when moving the gradient into the expectation and refer to the original paper for a more rigorous version. The gradient of the logarithm decomposes into two terms,

$$g_t^1 = \nabla \log \frac{P(w_1, \mathbf{h}_1)}{q(\mathbf{h}_1)} \quad (23)$$

$$g_t^2 = \nabla \log \mathbb{E}_{q(\mathbf{h}_{2...T})} \left[ \frac{P(w_{2...T}, \mathbf{h}_{2...T} | \mathbf{h}_1)}{q(\mathbf{h}_{2...T})} \right] \quad (24)$$

The first is the contribution to our original ELBO normalized by the IWAE MC weights. The second is identical to our starting-point in (16) but for  $t = 2 \dots T$  and conditioned on  $\mathbf{h}_1^{(k)}$ . Iterating the above for  $t = 2 \dots T$  yields the desired bound.

To allow tractable gradient computation using the importance-weighted bound, we use two simplifications. First, we limit the computation of the weights  $\omega_t^{(k)}$  to a finite horizon of size 1 which reduces them to only the first factor in (21). Second, we forward only a single sample  $\mathbf{h}_t$  to the next time-step to remain in the usual single-sample sequential ELBO regime (which is important as  $g_t^2$  depends on  $\mathbf{h}_{t-1}$ ). That is, we sample  $\mathbf{h}_t$  proportional to the weights  $\omega_t^{(k)} \dots \omega_t^{(k)}$ . A more sophisticated solution would be to incorporate techniques from particle filtering which maintain a fixed-size sample population  $\{\mathbf{h}_t^{(1)}, \dots, \mathbf{h}_t^{(K)}\}$  that is updated over time.
